# Supplementary material for: Interpretable machine learning model based on the systemic inflammation response index and ultrasound features can predict central lymph node metastasis in cN0T1–T2 papillary thyroid carcinoma
Source: PubMed Central journal article supplement — Gland Surg. 2023 Nov 17;12(11):1485–99. doi: 10.21037/gs-23-349 (PMC10721554; doi:10.21037/gs-23-349), 2023-11-17
Supplement: gs-12-11-1485-dss.pdf [file gs-12-11-1485-dss.pdf]

## Data Sharing Statement

|                     |                                                                                                                                                     |                                                                                                                  |
|---------------------|-----------------------------------------------------------------------------------------------------------------------------------------------------|------------------------------------------------------------------------------------------------------------------|
| <b>Article Info</b> | <a href="https://dx.doi.org/10.21037/gs-23-349">https://dx.doi.org/10.21037/gs-23-349</a>                                                           |                                                                                                                  |
| <b>Item</b>         | <b>Question</b>                                                                                                                                     | <b>Authors' Response<br/>(place "-" if not applicable)</b>                                                       |
| 1                   | Would you like to share data collected for your study to others?                                                                                    | Yes                                                                                                              |
| 2                   | If not, would you like to share the reason for your decision?                                                                                       | -                                                                                                                |
| 3                   | What data in particular will be shared?                                                                                                             | All data                                                                                                         |
| 4                   | Any other documents will be shared? Such as study protocol, statistical analysis plan, informed consent form, clinical study report, analytic code. | Study protocol and statistical analysis plan.                                                                    |
| 5                   | When will data availability begin?                                                                                                                  | After the article published.                                                                                     |
| 6                   | When will data availability end?                                                                                                                    | Two years within the publication date, since the technique or data may be updated over time.                     |
| 7                   | To whom will you share the data?                                                                                                                    | Medical oncologists and thyroid surgeons who are interested in this study.                                       |
| 8                   | For what type of analysis or purpose?                                                                                                               | Making our research easier for potential readers to understand.                                                  |
| 9                   | How or where can the data/documents be obtained?                                                                                                    | The datasets generated for this study are available on request to the corresponding author.                      |
| 10                  | Any other restrictions?                                                                                                                             | We may balance the potential benefits and risks for each request and then provide the data that could be shared. |
